# Supplementary material for: Mesostructured chitosan–silica hybrid as a biodegradable carrier for a pH-responsive drug delivery system
Source: Royal Society of Chemistry journal article supplement (doi:10.1039/c2dt12347a), 2012-01-01
Supplement: c2dt12347a.pdf [file c2dt12347a.pdf]

Supplementary Material (ESI) for Dalton Transactions

# **Mesostructured Chitosan/Silica Hybrid as Biodegradable Carrier for pH-Responsive Drug Delivery System**

Haoquan Zheng, Zhehao Huang and Shunai Che\*

*School of Chemistry and Chemical Engineering, State Key Laboratory of Metal Matrix Composites, Shanghai Jiao Tong University, Key Laboratory for Thin Film and Microfabrication Technology of the Ministry of Education, 800 Dongchuan Road, Shanghai 200240, P.R.China. Fax: +86-21-5474-1297; Tel: +86-21-5474-2852; E-mail: [chesa@sjtu.edu.cn](mailto:chesa@sjtu.edu.cn)*

## **SUPPORTING INFORMATION**

**Table S1** A summary of the porous properties of extracted mesostructured CTS/silica hybrid in Figure 5.

| Sample                           | Surface area (m <sup>2</sup> /g) <sup>a</sup> | The diameters of the cavity (nm) <sup>b</sup> | The diameters of the window (nm) <sup>c</sup> | Pore Volume (mm <sup>3</sup> /g) <sup>d</sup> |
|----------------------------------|-----------------------------------------------|-----------------------------------------------|-----------------------------------------------|-----------------------------------------------|
| CTS-0-“NH <sub>2</sub> -Zn-DNR”  | 377                                           | 4.7                                           | 3.5                                           | 0.36                                          |
| CTS-10-“NH <sub>2</sub> -Zn-DNR” | 185                                           | 4.7                                           | 3.2                                           | 0.19                                          |
| CTS-20-“NH <sub>2</sub> -Zn-DNR” | 175                                           | 4.7                                           | 3.2                                           | 0.18                                          |
| CTS-30-“NH <sub>2</sub> -Zn-DNR” | 160                                           | 4.7                                           | 3.2                                           | 0.16                                          |
| CTS-40-“NH <sub>2</sub> -Zn-DNR” | 143                                           | 5.0                                           | 2.9                                           | 0.14                                          |

<sup>a</sup>Calculated by BET method; <sup>b</sup>Determined by the BJH pore size distribution (based on adsorption branch of isotherms); <sup>c</sup>Determined by the BJH pore size distribution (based on desorption branch of isotherms); <sup>d</sup>Calculated the adsorbed amount at relative pressure of ~0.99.
